# Supplementary material for: Localization Tools in General Purpose Game Engines: A Systematic Mapping Study
Source: Hindawi journal article supplement (doi:10.1155/2021/9979657), 2021-07-22
Supplement: f1 [file 9979657.f1.pdf]

## SUPPLEMENTAL MATERIALS

The tables with localization tools are structured using the following categories: *Name* – the name of the localization tool; *Developer* – the information found under the developer (or similar phrasing) information of the tool page; *Price* – the price listed in the tool library, with prices in US Dollar; *Category* – the specific category where the tool is located within; and *Keyword(s)* – the keywords used to find the tool in question through the search function.

Furthermore, in connection to each tool in the tables the following information is provided: (1) a summary/description of the tool copied from the tool library page; (2) a direct link to the tool's library page; and (3) a note whether the tool is classified (by the author) as tool facing (i.e. integration tools, adding functionality) or user facing (for content production, with a GUI for specific tasks).

All tools are found using the search query described in the method chapter, except for the Unity tool library where a specific localization tool category exists. Due to the larger number of localization tools in the Unity tool library, the table does not contain any descriptions of the specific tools.

### LOCALIZATION TOOLS IN CONSTRUCT TOOL LIBRARY

**Link to Construct Addons:** <https://www.construct.net/en/make-games/addons>

| Name                                                                                                                                                               | Developer          | Price       | Category       | Keyword(s)       |
|--------------------------------------------------------------------------------------------------------------------------------------------------------------------|--------------------|-------------|----------------|------------------|
| <b>c3-i18next</b>                                                                                                                                                  | <b>Viktor Nagy</b> | <b>Free</b> | <b>Plugins</b> | <b>Translat*</b> |
| A translation plugin for Construct 3 built on top of i18next.                                                                                                      |                    |             |                |                  |
| <b>Link:</b> <a href="https://www.construct.net/en/make-games/addons/249/c3-i18next">https://www.construct.net/en/make-games/addons/249/c3-i18next</a>             |                    |             |                |                  |
| <b>Classified as tool facing tool</b>                                                                                                                              |                    |             |                |                  |
| <b>Google Translate</b>                                                                                                                                            | <b>EMI INDO</b>    | <b>Free</b> | <b>Plugins</b> | <b>Translat*</b> |
| Cordova Plugin that implements MLKit Translation and Language Identification features. Supports both iOS and Android.                                              |                    |             |                |                  |
| <b>Link:</b> <a href="https://www.construct.net/en/make-games/addons/508/google-translate">https://www.construct.net/en/make-games/addons/508/google-translate</a> |                    |             |                |                  |
| <b>Classified as tool facing tool</b>                                                                                                                              |                    |             |                |                  |

Total number of User facing tools: 0

Total number of Tool facing tools: 2

### LOCALIZATION TOOLS IN CRYENGINE TOOL LIBRARY

**Link to CryEngine Marketplace:** <https://www.cryengine.com/marketplace>

No localization tools were found in the CryEngine tool library.

### LOCALIZATION TOOLS IN GAMEMAKER TOOL LIBRARY

**Link to GameMaker Marketplace:** <https://marketplace.yoyogames.com/>

| Name                                                                                                                                                                                                                                                                                                                                                                                                                                                                             | Developer            | Price           | Category             | Keyword(s)                  |
|----------------------------------------------------------------------------------------------------------------------------------------------------------------------------------------------------------------------------------------------------------------------------------------------------------------------------------------------------------------------------------------------------------------------------------------------------------------------------------|----------------------|-----------------|----------------------|-----------------------------|
| <b>Auto Multilanguage</b>                                                                                                                                                                                                                                                                                                                                                                                                                                                        | <b>Game Lab</b>      | <b>USD 0.99</b> | <b>Scripts/Other</b> | <b>Translat*, Language*</b> |
| This simple script allows you to easily create your own games multilanguage! The script works on all platform (Windows, Mac, Android, iOS, Tizen etc.).                                                                                                                                                                                                                                                                                                                          |                      |                 |                      |                             |
| <b>Link:</b> <a href="https://marketplace.yoyogames.com/assets/645/auto-multilanguage">https://marketplace.yoyogames.com/assets/645/auto-multilanguage</a>                                                                                                                                                                                                                                                                                                                       |                      |                 |                      |                             |
| <b>Classified as tool facing tool</b>                                                                                                                                                                                                                                                                                                                                                                                                                                            |                      |                 |                      |                             |
| <b>Arabic Support</b>                                                                                                                                                                                                                                                                                                                                                                                                                                                            | <b>Diaax Studios</b> | <b>Free</b>     | <b>Scripts/Other</b> | <b>Language*</b>            |
| Having problems with writing Arabic texts in your game? We suggest this first of its type, solution. Featuring :<br>An easy way to use, just call the function <code>adjust_arabic_text()</code> with string you want to display. Fully commented code. Can be modified for similar languages like Persian and Urdu. Possibility to merge words with Arabic letters and others with Latin letters without getting a spaghetti. We appreciate any comments or problems reporting. |                      |                 |                      |                             |
| <b>Link:</b> <a href="https://marketplace.yoyogames.com/assets/2415/arabic-support">https://marketplace.yoyogames.com/assets/2415/arabic-support</a>                                                                                                                                                                                                                                                                                                                             |                      |                 |                      |                             |
| <b>Classified as tool facing tool</b>                                                                                                                                                                                                                                                                                                                                                                                                                                            |                      |                 |                      |                             |
| <b>Easy_localization</b>                                                                                                                                                                                                                                                                                                                                                                                                                                                         | <b>AoD</b>           | <b>Free</b>     | <b>Scripts/Other</b> | <b>Locali*, Language*</b>   |

With 'Easy Localization' you can have your game in multilanguage in few and simple steps:  
 Define the strings your game will use and put them in the 'lang\_XX' scripts, one for each language you use, where XX are each one of the languages codes. Call 'scr\_initialize\_localization' for the first time. Call 'scr\_localize(string\_code)' to get a localized string, you can use it with any draw\_text function. Call 'scr\_set\_language(code)' to change current language to localize. Any number of languages you want. If you use a language with special chars as: á, é, í, ñ, etc. you'll need to create a font that contain this characters.

**Link:** [https://marketplace.yoyogames.com/assets/1048/easy\\_localization](https://marketplace.yoyogames.com/assets/1048/easy_localization)

**Classified as tool facing tool**

|                                 |                           |                 |                   |                           |
|---------------------------------|---------------------------|-----------------|-------------------|---------------------------|
| <b>Easy Localization Engine</b> | <b>White Rabbit Games</b> | <b>USD 0.99</b> | <b>Extensions</b> | <b>Locali*, Language*</b> |
|---------------------------------|---------------------------|-----------------|-------------------|---------------------------|

Do you have problems with localizations? Well, this is the perfect solution for you. Easy to use, you can add as many languages as you want. Useable in any OS

**Link:** <https://marketplace.yoyogames.com/assets/2166/easy-localization-engine>

**Classified as tool facing tool**

|                   |                 |             |                               |                             |
|-------------------|-----------------|-------------|-------------------------------|-----------------------------|
| <b>jTranslate</b> | <b>Chaserrx</b> | <b>Free</b> | <b>Scripts/Input / Output</b> | <b>Translat*, Language*</b> |
|-------------------|-----------------|-------------|-------------------------------|-----------------------------|

Translate text easily! This extension can make translating so much easier! All you have to do is create the language files and easily incorporate the 3 simple functions into your existing projects. jTranslate does the rest of the work! View the included readme file for a complete guide on how to use jTranslate.

**Link:** <https://marketplace.yoyogames.com/assets/4261/jtranslate>

**Classified as tool facing tool**

|                                    |               |                 |                 |                           |
|------------------------------------|---------------|-----------------|-----------------|---------------------------|
| <b>Multilanguage and Translate</b> | <b>Tizzio</b> | <b>USD 1.99</b> | <b>Projects</b> | <b>Locali*, Translat*</b> |
|------------------------------------|---------------|-----------------|-----------------|---------------------------|

Multiplatform (Desktop and mobile). Translates in all languages with MyMemory Translate. Available in realtime or in Pre-Release. Save and Load translations in the device. Editable translations with simple language files. Load language files from your website (so you can update translations after game release). Human translations has priority over Google Translate ones. allows users to take part actively in the translation process of your games. Simple to use. automatic translate doesn't work with HTML5, because of Cross domain origin security, but you can translate your game in pre-release and download translations from an url of your website

**Link:** <https://marketplace.yoyogames.com/assets/317/multilanguage-and-translate>

**Classified as tool facing tool**

|                             |                        |                 |                 |                           |
|-----------------------------|------------------------|-----------------|-----------------|---------------------------|
| <b>Multilingual Strings</b> | <b>Neko no bokkusu</b> | <b>USD 4.99</b> | <b>Projects</b> | <b>Locali*, Language*</b> |
|-----------------------------|------------------------|-----------------|-----------------|---------------------------|

This is an easy way to localize a game. It loads a file ".csv" in a format like: "Translation ID";"de-DE";"fr-FR";"en-US";"es-ES";"LANG";"Comment" The file can be created with a simple text editor, BabelEdit or Excel. Load the file with the function multilingual\_load(fname) and get the string in a language with multilingual\_string(ds\_map,language, translation\_id, default language) multilingual\_load reads a filename and returns a ds\_map. multilingual\_string finds the string in the ds\_map and if a language it's empty, it replaces it with the default language's string

**Link:** <https://marketplace.yoyogames.com/assets/8969/multilingual-strings>

**Classified as tool facing tool**

Total number of User facing tools: 0

Total number of Tool facing tools: 7

## LOCALIZATION TOOLS IN GODOT TOOL LIBRARY

Link to Godot Asset Library: <https://godotengine.org/asset-library>

| Name                                                                                                                                                                                                                                                                                                                                                                                                                                                 | Developer           | Price       | Category     | Keyword(s)       |
|------------------------------------------------------------------------------------------------------------------------------------------------------------------------------------------------------------------------------------------------------------------------------------------------------------------------------------------------------------------------------------------------------------------------------------------------------|---------------------|-------------|--------------|------------------|
| <b>GUI Translation Demo</b>                                                                                                                                                                                                                                                                                                                                                                                                                          | <b>Godot Engine</b> | <b>Free</b> | <b>Demos</b> | <b>Translat*</b> |
| A demo showing how Godot seamlessly enables the use of localized resources and texts.                                                                                                                                                                                                                                                                                                                                                                |                     |             |              |                  |
| Link: <a href="https://godotengine.org/asset-library/asset/134">https://godotengine.org/asset-library/asset/134</a>                                                                                                                                                                                                                                                                                                                                  |                     |             |              |                  |
| <b>Classified as tool facing tool (adding functionality, although its main purpose is to demonstrate)</b>                                                                                                                                                                                                                                                                                                                                            |                     |             |              |                  |
| <b>Localization Editor</b>                                                                                                                                                                                                                                                                                                                                                                                                                           | <b>VP-GAMES</b>     | <b>Free</b> | <b>Tools</b> | <b>Locali*</b>   |
| This is a Godot Editor plugin to manage localization data. The plugin allows you to quickly and easily edit translations in csv format. You can also auto translate your text (built in Google Translator) Remaps are also supported. Resources are assigned very easily using drag and drop. The assigned resources can be viewed in preview window, to check them. Inputs are also checked for errors. The wrong entries are highlighted in color. |                     |             |              |                  |
| Link: <a href="https://godotengine.org/asset-library/asset/773">https://godotengine.org/asset-library/asset/773</a>                                                                                                                                                                                                                                                                                                                                  |                     |             |              |                  |
| <b>Classified as user facing tool</b>                                                                                                                                                                                                                                                                                                                                                                                                                |                     |             |              |                  |
| <b>Translation editor</b>                                                                                                                                                                                                                                                                                                                                                                                                                            | <b>Zylnn</b>        | <b>Free</b> | <b>Tools</b> | <b>Translat*</b> |
| An editor plugin to edit translation files from inside Godot Engine. It supports .csv and .po files, although gettext support is limited to what Godot can handle. It can also be used as a standalone editor if translation_editor.tscn is run or exported as main scene.                                                                                                                                                                           |                     |             |              |                  |
| Link: <a href="https://godotengine.org/asset-library/asset/284">https://godotengine.org/asset-library/asset/284</a>                                                                                                                                                                                                                                                                                                                                  |                     |             |              |                  |
| <b>Classified as user facing tool</b>                                                                                                                                                                                                                                                                                                                                                                                                                |                     |             |              |                  |

Total number of User facing tools: 2

Total number of Tool facing tools: 1

## LOCALIZATION TOOLS IN UNITY TOOL LIBRARY

Link to Unity Asset Store: <https://assetstore.unity.com/>

| Name                                                                                                                                                                                                                | Developer                    | Price            | Categorized as:    |
|---------------------------------------------------------------------------------------------------------------------------------------------------------------------------------------------------------------------|------------------------------|------------------|--------------------|
| <b>I2 Localization</b>                                                                                                                                                                                              | <b>Inter Illusion</b>        | <b>USD 45</b>    | <b>User facing</b> |
| <a href="https://assetstore.unity.com/packages/tools/localization/i2-localization-14884">https://assetstore.unity.com/packages/tools/localization/i2-localization-14884</a>                                         |                              |                  |                    |
| <b>Databox - Localization addon</b>                                                                                                                                                                                 | <b>doorfortyfour</b>         | <b>USD 15</b>    | <b>User facing</b> |
| <a href="https://assetstore.unity.com/packages/tools/localization/databox-localization-addon-183797">https://assetstore.unity.com/packages/tools/localization/databox-localization-addon-183797</a>                 |                              |                  |                    |
| <b>Bad Word Filter PRO</b>                                                                                                                                                                                          | <b>crosstales</b>            | <b>USD 48</b>    | <b>User facing</b> |
| <a href="https://assetstore.unity.com/packages/tools/localization/bad-word-filter-pro-26255">https://assetstore.unity.com/packages/tools/localization/bad-word-filter-pro-26255</a>                                 |                              |                  |                    |
| <b>CGLocalization</b>                                                                                                                                                                                               | <b>Franco Rosatto</b>        | <b>USD 28.60</b> | <b>User facing</b> |
| <a href="https://assetstore.unity.com/packages/tools/localization/cglocalization-130251">https://assetstore.unity.com/packages/tools/localization/cglocalization-130251</a>                                         |                              |                  |                    |
| <b>BG Localization</b>                                                                                                                                                                                              | <b>BansheeGz</b>             | <b>USD 40</b>    | <b>User facing</b> |
| <a href="https://assetstore.unity.com/packages/tools/localization/bg-localization-114740">https://assetstore.unity.com/packages/tools/localization/bg-localization-114740</a>                                       |                              |                  |                    |
| <b>Easy Alphabet Arabic</b>                                                                                                                                                                                         | <b>Fayyad Sufyan</b>         | <b>USD 20</b>    | <b>Tool facing</b> |
| <a href="https://assetstore.unity.com/packages/tools/localization/easy-alphabet-arabic-56625">https://assetstore.unity.com/packages/tools/localization/easy-alphabet-arabic-56625</a>                               |                              |                  |                    |
| <b>Fleece</b>                                                                                                                                                                                                       | <b>KaiClavier</b>            | <b>USD 65</b>    | <b>User facing</b> |
| <a href="https://assetstore.unity.com/packages/tools/localization/fleece-113132#content">https://assetstore.unity.com/packages/tools/localization/fleece-113132#content</a>                                         |                              |                  |                    |
| <b>Localizer</b>                                                                                                                                                                                                    | <b>OrangeTree</b>            | <b>USD 50</b>    | <b>Tool facing</b> |
| <a href="https://assetstore.unity.com/packages/tools/localization/localizer-73930">https://assetstore.unity.com/packages/tools/localization/localizer-73930</a>                                                     |                              |                  |                    |
| <b>IUnified</b>                                                                                                                                                                                                     | <b>Wounded Wolf</b>          | <b>USD 5</b>     | <b>Tool facing</b> |
| <a href="https://assetstore.unity.com/packages/tools/localization/iunified-12117">https://assetstore.unity.com/packages/tools/localization/iunified-12117</a>                                                       |                              |                  |                    |
| <b>Universal Chat (Real-Time Translator)</b>                                                                                                                                                                        | <b>IjDevelopment</b>         | <b>USD 45</b>    | <b>Tool facing</b> |
| <a href="https://assetstore.unity.com/packages/tools/localization/universal-chat-real-time-translator-15177">https://assetstore.unity.com/packages/tools/localization/universal-chat-real-time-translator-15177</a> |                              |                  |                    |
| <b>Autonamer</b>                                                                                                                                                                                                    | <b>Virtual Escapes</b>       | <b>USD 14.99</b> | <b>User facing</b> |
| <a href="https://assetstore.unity.com/packages/tools/localization/autonamer-146958">https://assetstore.unity.com/packages/tools/localization/autonamer-146958</a>                                                   |                              |                  |                    |
| <b>DevXUnity-Localization</b>                                                                                                                                                                                       | <b>DevXDevelopment</b>       | <b>USD 30</b>    | <b>User facing</b> |
| <a href="https://assetstore.unity.com/packages/tools/localization/devxunity-localization-87881">https://assetstore.unity.com/packages/tools/localization/devxunity-localization-87881</a>                           |                              |                  |                    |
| <b>Localization Editor</b>                                                                                                                                                                                          | <b>Stay At Home Devs LLC</b> | <b>USD 30</b>    | <b>User facing</b> |
| <a href="https://assetstore.unity.com/packages/tools/localization/localization-editor-36006">https://assetstore.unity.com/packages/tools/localization/localization-editor-36006</a>                                 |                              |                  |                    |

|                                                                                                                                                                                                                                                                                 |                           |                  |                    |
|---------------------------------------------------------------------------------------------------------------------------------------------------------------------------------------------------------------------------------------------------------------------------------|---------------------------|------------------|--------------------|
| <b>Language Manager (Text &amp; Audio)</b>                                                                                                                                                                                                                                      | <b>TinQwise Immersive</b> | <b>USD 29.99</b> | <b>User facing</b> |
| <a href="https://assetstore.unity.com/packages/tools/localization/language-manager-text-audio-147997">https://assetstore.unity.com/packages/tools/localization/language-manager-text-audio-147997</a>                                                                           |                           |                  |                    |
| <b>Localization Manager</b>                                                                                                                                                                                                                                                     | <b>Yu Yang</b>            | <b>USD 28</b>    | <b>Tool facing</b> |
| <a href="https://assetstore.unity.com/packages/tools/localization/localization-manager-158921">https://assetstore.unity.com/packages/tools/localization/localization-manager-158921</a>                                                                                         |                           |                  |                    |
| <b>Pan Localization</b>                                                                                                                                                                                                                                                         | <b>SpadeAce</b>           | <b>USD 25</b>    | <b>User facing</b> |
| <a href="https://assetstore.unity.com/packages/tools/localization/pan-localization-10021">https://assetstore.unity.com/packages/tools/localization/pan-localization-10021</a>                                                                                                   |                           |                  |                    |
| <b>Localising</b>                                                                                                                                                                                                                                                               | <b>Garth de Wet</b>       | <b>USD 25</b>    | <b>Tool facing</b> |
| <a href="https://assetstore.unity.com/packages/tools/localization/localising-1733">https://assetstore.unity.com/packages/tools/localization/localising-1733</a>                                                                                                                 |                           |                  |                    |
| <b>Bundle language manager</b>                                                                                                                                                                                                                                                  | <b>OliviaDevelop</b>      | <b>USD 24.95</b> | <b>User facing</b> |
| <a href="https://assetstore.unity.com/packages/tools/localization/bundle-language-manager-170711">https://assetstore.unity.com/packages/tools/localization/bundle-language-manager-170711</a>                                                                                   |                           |                  |                    |
| <b>One Click Localization</b>                                                                                                                                                                                                                                                   | <b>Red Giraffe Games</b>  | <b>USD 15</b>    | <b>User facing</b> |
| <a href="https://assetstore.unity.com/packages/tools/localization/one-click-localization-76358">https://assetstore.unity.com/packages/tools/localization/one-click-localization-76358</a>                                                                                       |                           |                  |                    |
| <b>Localized Display Name</b>                                                                                                                                                                                                                                                   | <b>ContinueButton</b>     | <b>USD 19.99</b> | <b>Tool facing</b> |
| <a href="https://assetstore.unity.com/packages/tools/localization/localized-display-name-141833">https://assetstore.unity.com/packages/tools/localization/localized-display-name-141833</a>                                                                                     |                           |                  |                    |
| <b>UniLang</b>                                                                                                                                                                                                                                                                  | <b>Aspermind studio</b>   | <b>USD 20</b>    | <b>Tool facing</b> |
| <a href="https://assetstore.unity.com/packages/tools/localization/unilang-106458">https://assetstore.unity.com/packages/tools/localization/unilang-106458</a>                                                                                                                   |                           |                  |                    |
| <b>UniTranslate Localization System</b>                                                                                                                                                                                                                                         | <b>SkaillZ</b>            | <b>USD 20</b>    | <b>User facing</b> |
| <a href="https://assetstore.unity.com/packages/tools/localization/unitranslate-localization-system-59003">https://assetstore.unity.com/packages/tools/localization/unitranslate-localization-system-59003</a>                                                                   |                           |                  |                    |
| <b>DocsPin-Google Drive Localization</b>                                                                                                                                                                                                                                        | <b>Easyggsoft</b>         | <b>USD 15</b>    | <b>Tool facing</b> |
| <a href="https://assetstore.unity.com/packages/tools/localization/docspin-google-drive-localization-20777">https://assetstore.unity.com/packages/tools/localization/docspin-google-drive-localization-20777</a>                                                                 |                           |                  |                    |
| <b>Localize Asset</b>                                                                                                                                                                                                                                                           | <b>MeadowsPhone Team</b>  | <b>USD 15</b>    | <b>User facing</b> |
| <a href="https://assetstore.unity.com/packages/tools/localization/localize-asset-62047">https://assetstore.unity.com/packages/tools/localization/localize-asset-62047</a>                                                                                                       |                           |                  |                    |
| <b>LockKey - Localization</b>                                                                                                                                                                                                                                                   | <b>Nerdvania</b>          | <b>USD 15</b>    | <b>Tool facing</b> |
| <a href="https://assetstore.unity.com/packages/tools/localization/lockkey-localization-106082">https://assetstore.unity.com/packages/tools/localization/lockkey-localization-106082</a>                                                                                         |                           |                  |                    |
| <b>No Such Localization (Pro)</b>                                                                                                                                                                                                                                               | <b>No Such Studio</b>     | <b>USD 14.99</b> | <b>Tool facing</b> |
| <a href="https://assetstore.unity.com/packages/tools/localization/no-such-localization-pro-162777">https://assetstore.unity.com/packages/tools/localization/no-such-localization-pro-162777</a>                                                                                 |                           |                  |                    |
| <b>TinyLocalization 2</b>                                                                                                                                                                                                                                                       | <b>Singularity studio</b> | <b>USD 14.99</b> | <b>User facing</b> |
| <a href="https://assetstore.unity.com/packages/tools/localization/tinylocalization-2-100489">https://assetstore.unity.com/packages/tools/localization/tinylocalization-2-100489</a>                                                                                             |                           |                  |                    |
| <b>Calliope - Translation Manager</b>                                                                                                                                                                                                                                           | <b>Explorers Lab</b>      | <b>USD 14.99</b> | <b>User facing</b> |
| <a href="https://assetstore.unity.com/packages/tools/localization/calliope-translation-manager-143474">https://assetstore.unity.com/packages/tools/localization/calliope-translation-manager-143474</a>                                                                         |                           |                  |                    |
| <b>LoraLang / No keys localization</b>                                                                                                                                                                                                                                          | <b>DESTPLAY TECH</b>      | <b>USD 13</b>    | <b>Tool facing</b> |
| <a href="https://assetstore.unity.com/packages/tools/localization/loralang-no-keys-localization-146057">https://assetstore.unity.com/packages/tools/localization/loralang-no-keys-localization-146057</a>                                                                       |                           |                  |                    |
| <b>Lean Localization</b>                                                                                                                                                                                                                                                        | <b>Carlos Wilkes</b>      | <b>Free</b>      | <b>Tool facing</b> |
| <a href="https://assetstore.unity.com/packages/tools/localization/lean-localization-28504">https://assetstore.unity.com/packages/tools/localization/lean-localization-28504</a>                                                                                                 |                           |                  |                    |
| <b>JLoc Language Manager</b>                                                                                                                                                                                                                                                    | <b>Fabian Kober</b>       | <b>USD 12</b>    | <b>Tool facing</b> |
| <a href="https://assetstore.unity.com/packages/tools/localization/jloc-language-manager-140494">https://assetstore.unity.com/packages/tools/localization/jloc-language-manager-140494</a>                                                                                       |                           |                  |                    |
| <b>Language Manager</b>                                                                                                                                                                                                                                                         | <b>TekkTech</b>           | <b>Free</b>      | <b>Tool facing</b> |
| <a href="https://assetstore.unity.com/packages/tools/localization/language-manager-189273">https://assetstore.unity.com/packages/tools/localization/language-manager-189273</a>                                                                                                 |                           |                  |                    |
| <b>MULTILANGUAGE   Localization &amp; Translation</b>                                                                                                                                                                                                                           | <b>Hot Soup Games</b>     | <b>USD 10</b>    | <b>User facing</b> |
| <a href="https://assetstore.unity.com/packages/tools/localization/multilanguage-localization-translation-android-ios-windows-and-m-179267">https://assetstore.unity.com/packages/tools/localization/multilanguage-localization-translation-android-ios-windows-and-m-179267</a> |                           |                  |                    |
| <b>Localization Flow</b>                                                                                                                                                                                                                                                        | <b>VP-BYTE</b>            | <b>USD 9.99</b>  | <b>User facing</b> |
| <a href="https://assetstore.unity.com/packages/tools/localization/localization-flow-144256">https://assetstore.unity.com/packages/tools/localization/localization-flow-144256</a>                                                                                               |                           |                  |                    |
| <b>Localization - Translation Memory Manager</b>                                                                                                                                                                                                                                | <b>Gtadeon</b>            | <b>USD 9</b>     | <b>Tool facing</b> |
| <a href="https://assetstore.unity.com/packages/tools/localization/localization-translation-memory-manager-81012">https://assetstore.unity.com/packages/tools/localization/localization-translation-memory-manager-81012</a>                                                     |                           |                  |                    |
| <b>Lingua - Dynamic Localization Manager</b>                                                                                                                                                                                                                                    | <b>Bloc</b>               | <b>USD 8.99</b>  | <b>Tool facing</b> |
| <a href="https://assetstore.unity.com/packages/tools/localization/lingua-dynamic-localization-manager-175103">https://assetstore.unity.com/packages/tools/localization/lingua-dynamic-localization-manager-175103</a>                                                           |                           |                  |                    |
| <b>Babel Translation Toolkit</b>                                                                                                                                                                                                                                                | <b>Ward Dehairs</b>       | <b>USD 8</b>     | <b>Tool facing</b> |
| <a href="https://assetstore.unity.com/packages/tools/localization/babel-translation-toolkit-157425">https://assetstore.unity.com/packages/tools/localization/babel-translation-toolkit-157425</a>                                                                               |                           |                  |                    |
| <b>Easy Localize</b>                                                                                                                                                                                                                                                            | <b>Max2D</b>              | <b>USD 5</b>     | <b>Tool facing</b> |
| <a href="https://assetstore.unity.com/packages/tools/localization/easy-localize-109425">https://assetstore.unity.com/packages/tools/localization/easy-localize-109425</a>                                                                                                       |                           |                  |                    |
| <b>Easy Translations and Localization</b>                                                                                                                                                                                                                                       | <b>Istâke</b>             | <b>USD 7.50</b>  | <b>User facing</b> |
| <a href="https://assetstore.unity.com/packages/tools/localization/easy-translations-and-localization-128027">https://assetstore.unity.com/packages/tools/localization/easy-translations-and-localization-128027</a>                                                             |                           |                  |                    |
| <b>SimpleLocalization</b>                                                                                                                                                                                                                                                       | <b>Oruka</b>              | <b>USD 6.99</b>  | <b>Tool facing</b> |
| <a href="https://assetstore.unity.com/packages/tools/localization/simplelocalization-134316">https://assetstore.unity.com/packages/tools/localization/simplelocalization-134316</a>                                                                                             |                           |                  |                    |
| <b>AutoLocalization</b>                                                                                                                                                                                                                                                         | <b>Kan.Kikuchi</b>        | <b>USD 4.99</b>  | <b>Tool facing</b> |
| <a href="https://assetstore.unity.com/packages/tools/localization/autolocalization-69082">https://assetstore.unity.com/packages/tools/localization/autolocalization-69082</a>                                                                                                   |                           |                  |                    |
| <b>One Click Localization - Full Auto</b>                                                                                                                                                                                                                                       | <b>Orion Games</b>        | <b>USD 4.99</b>  | <b>Tool facing</b> |

|                                                                                                                                                                                                                                                           |                               |                 |                    |
|-----------------------------------------------------------------------------------------------------------------------------------------------------------------------------------------------------------------------------------------------------------|-------------------------------|-----------------|--------------------|
| <a href="https://assetstore.unity.com/packages/tools/localization/one-click-localization-full-auto-109818">https://assetstore.unity.com/packages/tools/localization/one-click-localization-full-auto-109818</a>                                           |                               |                 |                    |
| <b>Global Variables Localization</b>                                                                                                                                                                                                                      | <b>Casarotto Developer</b>    | <b>USD 4.99</b> | <b>Tool facing</b> |
| <a href="https://assetstore.unity.com/packages/tools/localization/global-variables-localization-177357">https://assetstore.unity.com/packages/tools/localization/global-variables-localization-177357</a>                                                 |                               |                 |                    |
| <b>XML Localization</b>                                                                                                                                                                                                                                   | <b>Jaroslav Wątroba</b>       | <b>USD 5</b>    | <b>Tool facing</b> |
| <a href="https://assetstore.unity.com/packages/tools/localization/xml-localization-crossplatform-ui-text-image-auto-swap-48673">https://assetstore.unity.com/packages/tools/localization/xml-localization-crossplatform-ui-text-image-auto-swap-48673</a> |                               |                 |                    |
| <b>AutoTranslate &amp; Localization</b>                                                                                                                                                                                                                   | <b>Code Cabin</b>             | <b>USD 5</b>    | <b>Tool facing</b> |
| <a href="https://assetstore.unity.com/packages/tools/localization/autotranslate-localization-67145">https://assetstore.unity.com/packages/tools/localization/autotranslate-localization-67145</a>                                                         |                               |                 |                    |
| <b>Babelfish Language Detection</b>                                                                                                                                                                                                                       | <b>Wizcorp Inc</b>            | <b>USD 5</b>    | <b>Tool facing</b> |
| <a href="https://assetstore.unity.com/packages/tools/localization/babelfish-language-detection-33320">https://assetstore.unity.com/packages/tools/localization/babelfish-language-detection-33320</a>                                                     |                               |                 |                    |
| <b>EpicTranslate</b>                                                                                                                                                                                                                                      | <b>Hot Totem Assets</b>       | <b>USD 5</b>    | <b>User facing</b> |
| <a href="https://assetstore.unity.com/packages/tools/localization/epictranslate-84969">https://assetstore.unity.com/packages/tools/localization/epictranslate-84969</a>                                                                                   |                               |                 |                    |
| <b>Locator Tool</b>                                                                                                                                                                                                                                       | <b>SaYoS</b>                  | <b>USD 5</b>    | <b>Tool facing</b> |
| <a href="https://assetstore.unity.com/packages/tools/localization/locator-tool-98273">https://assetstore.unity.com/packages/tools/localization/locator-tool-98273</a>                                                                                     |                               |                 |                    |
| <b>Simple Localizator</b>                                                                                                                                                                                                                                 | <b>Night Lord Development</b> | <b>USD 5</b>    | <b>Tool facing</b> |
| <a href="https://assetstore.unity.com/packages/tools/localization/simple-localizator-110739">https://assetstore.unity.com/packages/tools/localization/simple-localizator-110739</a>                                                                       |                               |                 |                    |
| <b>New Localization System</b>                                                                                                                                                                                                                            | <b>Valeron</b>                | <b>USD 5</b>    | <b>Tool facing</b> |
| <a href="https://assetstore.unity.com/packages/tools/localization/new-localization-system-170041">https://assetstore.unity.com/packages/tools/localization/new-localization-system-170041</a>                                                             |                               |                 |                    |
| <b>TranslationsLab</b>                                                                                                                                                                                                                                    | <b>Chillout Labs</b>          | <b>USD 5</b>    | <b>Tool facing</b> |
| <a href="https://assetstore.unity.com/packages/tools/localization/translationslab-167488">https://assetstore.unity.com/packages/tools/localization/translationslab-167488</a>                                                                             |                               |                 |                    |
| <b>Localization System</b>                                                                                                                                                                                                                                | <b>Asset Repository</b>       | <b>USD 4.99</b> | <b>Tool facing</b> |
| <a href="https://assetstore.unity.com/packages/tools/localization/localization-system-4421">https://assetstore.unity.com/packages/tools/localization/localization-system-4421</a>                                                                         |                               |                 |                    |
| <b>CodeGen Localization</b>                                                                                                                                                                                                                               | <b>CodeGen</b>                | <b>USD 4.99</b> | <b>Tool facing</b> |
| <a href="https://assetstore.unity.com/packages/tools/localization/codegen-localization-77528">https://assetstore.unity.com/packages/tools/localization/codegen-localization-77528</a>                                                                     |                               |                 |                    |
| <b>Localization++</b>                                                                                                                                                                                                                                     | <b>Engin Yildirim</b>         | <b>USD 4.99</b> | <b>Tool facing</b> |
| <a href="https://assetstore.unity.com/packages/tools/localization/localization-10487">https://assetstore.unity.com/packages/tools/localization/localization-10487</a>                                                                                     |                               |                 |                    |
| <b>Android Strings Reader (Easy Translation)</b>                                                                                                                                                                                                          | <b>Thalamus</b>               | <b>USD 4.99</b> | <b>Tool facing</b> |
| <a href="https://assetstore.unity.com/packages/tools/localization/android-strings-reader-easy-translation-11581">https://assetstore.unity.com/packages/tools/localization/android-strings-reader-easy-translation-11581</a>                               |                               |                 |                    |
| <b>Language Internationalization</b>                                                                                                                                                                                                                      | <b>lukasi</b>                 | <b>USD 4.99</b> | <b>Tool facing</b> |
| <a href="https://assetstore.unity.com/packages/tools/localization/language-internationalization-4325">https://assetstore.unity.com/packages/tools/localization/language-internationalization-4325</a>                                                     |                               |                 |                    |
| <b>Translation Helper</b>                                                                                                                                                                                                                                 | <b>Firefly</b>                | <b>USD 4.99</b> | <b>Tool facing</b> |
| <a href="https://assetstore.unity.com/packages/tools/localization/translation-helper-102749">https://assetstore.unity.com/packages/tools/localization/translation-helper-102749</a>                                                                       |                               |                 |                    |
| <b>Simple Text Localization</b>                                                                                                                                                                                                                           | <b>Alessio</b>                | <b>USD 4.99</b> | <b>Tool facing</b> |
| <a href="https://assetstore.unity.com/packages/tools/localization/simple-text-localization-132548">https://assetstore.unity.com/packages/tools/localization/simple-text-localization-132548</a>                                                           |                               |                 |                    |
| <b>Geeky Localizator</b>                                                                                                                                                                                                                                  | <b>Geeky Assets</b>           | <b>USD 4.99</b> | <b>Tool facing</b> |
| <a href="https://assetstore.unity.com/packages/tools/localization/geeky-localizator-137758">https://assetstore.unity.com/packages/tools/localization/geeky-localizator-137758</a>                                                                         |                               |                 |                    |
| <b>Localization system in json format</b>                                                                                                                                                                                                                 | <b>Denis Dzherihov</b>        | <b>USD 4.99</b> | <b>Tool facing</b> |
| <a href="https://assetstore.unity.com/packages/tools/localization/localization-system-in-json-format-179508">https://assetstore.unity.com/packages/tools/localization/localization-system-in-json-format-179508</a>                                       |                               |                 |                    |
| <b>Translation system / I18N Plugin / Language</b>                                                                                                                                                                                                        | <b>HONETi</b>                 | <b>Free</b>     | <b>Tool facing</b> |
| <a href="https://assetstore.unity.com/packages/tools/localization/translation-system-i18n-plugin-languages-59716">https://assetstore.unity.com/packages/tools/localization/translation-system-i18n-plugin-languages-59716</a>                             |                               |                 |                    |
| <b>EDGE Standard Assets</b>                                                                                                                                                                                                                               | <b>Productive Edge</b>        | <b>Free</b>     | <b>Tool facing</b> |
| <a href="https://assetstore.unity.com/packages/tools/localization/edge-standard-assets-119235">https://assetstore.unity.com/packages/tools/localization/edge-standard-assets-119235</a>                                                                   |                               |                 |                    |
| <b>Asset Localization</b>                                                                                                                                                                                                                                 | <b>H.Ibrahim Penekli</b>      | <b>Free</b>     | <b>Tool facing</b> |
| <a href="https://assetstore.unity.com/packages/tools/localization/asset-localization-100473">https://assetstore.unity.com/packages/tools/localization/asset-localization-100473</a>                                                                       |                               |                 |                    |
| <b>Auto Localization</b>                                                                                                                                                                                                                                  | <b>Waqas Hashmi</b>           | <b>Free</b>     | <b>Tool facing</b> |
| <a href="https://assetstore.unity.com/packages/tools/localization/auto-localization-97489">https://assetstore.unity.com/packages/tools/localization/auto-localization-97489</a>                                                                           |                               |                 |                    |
| <b>J Multi Language</b>                                                                                                                                                                                                                                   | <b>Jun</b>                    | <b>Free</b>     | <b>Tool facing</b> |
| <a href="https://assetstore.unity.com/packages/tools/localization/j-multi-language-110033">https://assetstore.unity.com/packages/tools/localization/j-multi-language-110033</a>                                                                           |                               |                 |                    |
| <b>No Such Localization (Lite)</b>                                                                                                                                                                                                                        | <b>No Such Studio</b>         | <b>Free</b>     | <b>Tool facing</b> |
| <a href="https://assetstore.unity.com/packages/tools/localization/no-such-localization-lite-162190">https://assetstore.unity.com/packages/tools/localization/no-such-localization-lite-162190</a>                                                         |                               |                 |                    |
| <b>Free - Localized Display Name</b>                                                                                                                                                                                                                      | <b>ContinueButton</b>         | <b>Free</b>     | <b>Tool facing</b> |
| <a href="https://assetstore.unity.com/packages/tools/localization/free-localized-display-name-154246">https://assetstore.unity.com/packages/tools/localization/free-localized-display-name-154246</a>                                                     |                               |                 |                    |
| <b>Language Localization</b>                                                                                                                                                                                                                              | <b>Matej Vanco</b>            | <b>Free</b>     | <b>Tool facing</b> |
| <a href="https://assetstore.unity.com/packages/tools/localization/language-localization-131052">https://assetstore.unity.com/packages/tools/localization/language-localization-131052</a>                                                                 |                               |                 |                    |
| <b>Localization Service</b>                                                                                                                                                                                                                               | <b>SunCube</b>                | <b>Free</b>     | <b>Tool facing</b> |
| <a href="https://assetstore.unity.com/packages/tools/localization/localization-service-50442">https://assetstore.unity.com/packages/tools/localization/localization-service-50442</a>                                                                     |                               |                 |                    |
| <b>AutoTranslator</b>                                                                                                                                                                                                                                     | <b>MrRockis</b>               | <b>Free</b>     | <b>Tool facing</b> |
| <a href="https://assetstore.unity.com/packages/tools/localization/autotranslator-102858">https://assetstore.unity.com/packages/tools/localization/autotranslator-102858</a>                                                                               |                               |                 |                    |

|                                                                                                                                                                                                                 |                        |             |                    |
|-----------------------------------------------------------------------------------------------------------------------------------------------------------------------------------------------------------------|------------------------|-------------|--------------------|
| <b>qDev   Localization</b>                                                                                                                                                                                      | <b>Quadra</b>          | <b>Free</b> | <b>Tool facing</b> |
| <a href="https://assetstore.unity.com/packages/tools/localization/qdev-localization-188253">https://assetstore.unity.com/packages/tools/localization/qdev-localization-188253</a>                               |                        |             |                    |
| <b>KNOT Localization</b>                                                                                                                                                                                        | <b>V0odo0</b>          | <b>Free</b> | <b>Tool facing</b> |
| <a href="https://assetstore.unity.com/packages/tools/localization/knot-localization-187603">https://assetstore.unity.com/packages/tools/localization/knot-localization-187603</a>                               |                        |             |                    |
| <b>Localization.po</b>                                                                                                                                                                                          | <b>KatyCorp</b>        | <b>Free</b> | <b>Tool facing</b> |
| <a href="https://assetstore.unity.com/packages/tools/localization/localization-po-159949">https://assetstore.unity.com/packages/tools/localization/localization-po-159949</a>                                   |                        |             |                    |
| <b>Localization Wizard</b>                                                                                                                                                                                      | <b>Chumakov Alexey</b> | <b>Free</b> | <b>Tool facing</b> |
| <a href="https://assetstore.unity.com/packages/tools/localization/localization-wizard-99863">https://assetstore.unity.com/packages/tools/localization/localization-wizard-99863</a>                             |                        |             |                    |
| <b>Simple CSV Localization</b>                                                                                                                                                                                  | <b>Monofab</b>         | <b>Free</b> | <b>Tool facing</b> |
| <a href="https://assetstore.unity.com/packages/tools/localization/simple-csv-localization-164947">https://assetstore.unity.com/packages/tools/localization/simple-csv-localization-164947</a>                   |                        |             |                    |
| <b>Base Localization Tool</b>                                                                                                                                                                                   | <b>NAMI TENTOU</b>     | <b>Free</b> | <b>Tool facing</b> |
| <a href="https://assetstore.unity.com/packages/tools/localization/base-localization-tool-83871">https://assetstore.unity.com/packages/tools/localization/base-localization-tool-83871</a>                       |                        |             |                    |
| <b>Loclink – One-click Localization</b>                                                                                                                                                                         | <b>Native Prime</b>    | <b>Free</b> | <b>Tool facing</b> |
| <a href="https://assetstore.unity.com/packages/tools/localization/loclink-one-click-localization-75295">https://assetstore.unity.com/packages/tools/localization/loclink-one-click-localization-75295</a>       |                        |             |                    |
| <b>Howl - The Symbolic Notation for C#</b>                                                                                                                                                                      | <b>Activ</b>           | <b>Free</b> | <b>Tool facing</b> |
| <a href="https://assetstore.unity.com/packages/tools/localization/howl-the-symbolic-notation-for-c-177081">https://assetstore.unity.com/packages/tools/localization/howl-the-symbolic-notation-for-c-177081</a> |                        |             |                    |
| <b>FuncAnalyzer</b>                                                                                                                                                                                             | <b>lujun</b>           | <b>Free</b> | <b>Tool facing</b> |
| <a href="https://assetstore.unity.com/packages/tools/localization/funcanalyzer-164221">https://assetstore.unity.com/packages/tools/localization/funcanalyzer-164221</a>                                         |                        |             |                    |

Total number of User facing tools: 21

Total number of Tool facing tools: 59

## LOCALIZATION TOOLS IN UNREAL ENGINE TOOL LIBRARY

Link to Unreal Engine Marketplace: <https://www.unrealengine.com/marketplace/>

| Name                                                                                                                                                                                                                                                                                                                                                                                                                                                                                                                                                                                                                                                                                                                                                                                                                                                                                                                                                                                                                                                                                                                                                                               | Developer        | Price            | Category                | Keyword(s)                 |
|------------------------------------------------------------------------------------------------------------------------------------------------------------------------------------------------------------------------------------------------------------------------------------------------------------------------------------------------------------------------------------------------------------------------------------------------------------------------------------------------------------------------------------------------------------------------------------------------------------------------------------------------------------------------------------------------------------------------------------------------------------------------------------------------------------------------------------------------------------------------------------------------------------------------------------------------------------------------------------------------------------------------------------------------------------------------------------------------------------------------------------------------------------------------------------|------------------|------------------|-------------------------|----------------------------|
| <b>AwsCore::Translate</b>                                                                                                                                                                                                                                                                                                                                                                                                                                                                                                                                                                                                                                                                                                                                                                                                                                                                                                                                                                                                                                                                                                                                                          | <b>eeldev</b>    | <b>USD 19.99</b> | <b>Engine Plugin</b>    | <b>Translat*, Languag*</b> |
| Use Amazon Translate Inside Unreal Engine 4                                                                                                                                                                                                                                                                                                                                                                                                                                                                                                                                                                                                                                                                                                                                                                                                                                                                                                                                                                                                                                                                                                                                        |                  |                  |                         |                            |
| <b>Link:</b> <a href="https://www.unrealengine.com/marketplace/en-US/product/awscore-translate">https://www.unrealengine.com/marketplace/en-US/product/awscore-translate</a>                                                                                                                                                                                                                                                                                                                                                                                                                                                                                                                                                                                                                                                                                                                                                                                                                                                                                                                                                                                                       |                  |                  |                         |                            |
| <b>Classified as tool facing tool</b>                                                                                                                                                                                                                                                                                                                                                                                                                                                                                                                                                                                                                                                                                                                                                                                                                                                                                                                                                                                                                                                                                                                                              |                  |                  |                         |                            |
| <b>MSL Toolkit</b>                                                                                                                                                                                                                                                                                                                                                                                                                                                                                                                                                                                                                                                                                                                                                                                                                                                                                                                                                                                                                                                                                                                                                                 | <b>Dino Zavr</b> | <b>USD 59.99</b> | <b>Complete Project</b> | <b>Locali*</b>             |
| This toolkit provides Menu, Settings, and Localization systems, with a wide range of features that can fit any project needs. It can be used to build complex Menus with gamepad/keyboard/mouse navigation working seamlessly. Menu system is a folder hierarchy based system, with the use of interaction presets, it can be used to create menus of any complexity level. The Settings system is implemented with easy adding custom settings and their behavior has input rebinding and saving/loading. Localization system is a very useful tool to use localize text and audio archives, and is more superior than the engine's default localization dashboard. Upgraded savegame system now, with folder based hierarchy feature, much precise and easy saving data and prioritized actors loading, to boot and init some actors earlier than others for complex systems. All those systems can work separately but they are compatible with each other, in the example demonstration they are working together. This system can help and speed up any menu building process in the engine and save much time, this is very big and complex system with simplified workflow. |                  |                  |                         |                            |
| <b>Link:</b> <a href="https://www.unrealengine.com/marketplace/en-US/product/msl-toolkit">https://www.unrealengine.com/marketplace/en-US/product/msl-toolkit</a>                                                                                                                                                                                                                                                                                                                                                                                                                                                                                                                                                                                                                                                                                                                                                                                                                                                                                                                                                                                                                   |                  |                  |                         |                            |
| <b>Classified as user facing tool</b>                                                                                                                                                                                                                                                                                                                                                                                                                                                                                                                                                                                                                                                                                                                                                                                                                                                                                                                                                                                                                                                                                                                                              |                  |                  |                         |                            |
| <b>Translate with Blueprints by AWS</b>                                                                                                                                                                                                                                                                                                                                                                                                                                                                                                                                                                                                                                                                                                                                                                                                                                                                                                                                                                                                                                                                                                                                            | <b>BINXU</b>     | <b>USD 4.99</b>  | <b>Engine Plugin</b>    | <b>Translat*, Languag*</b> |
| It lets you to translate your text to other language with blueprint. No need any c++ knowledge requested. You also check what languages does aws translate support                                                                                                                                                                                                                                                                                                                                                                                                                                                                                                                                                                                                                                                                                                                                                                                                                                                                                                                                                                                                                 |                  |                  |                         |                            |
| <b>Link:</b> <a href="https://www.unrealengine.com/marketplace/en-US/product/translate-with-blueprints-by-aws">https://www.unrealengine.com/marketplace/en-US/product/translate-with-blueprints-by-aws</a>                                                                                                                                                                                                                                                                                                                                                                                                                                                                                                                                                                                                                                                                                                                                                                                                                                                                                                                                                                         |                  |                  |                         |                            |
| <b>Classified as tool facing tool</b>                                                                                                                                                                                                                                                                                                                                                                                                                                                                                                                                                                                                                                                                                                                                                                                                                                                                                                                                                                                                                                                                                                                                              |                  |                  |                         |                            |

Total number of User facing tools: 1

Total number of Tool facing tools: 2
